# Supplementary material for: Health-Adjusted Life Expectancy (HALE) in Korea: 2005–2011
Source: PubMed Central journal article supplement — J Korean Med Sci. 2016 Jun 8;31(Suppl 2):S139–45. doi: 10.3346/jkms.2016.31.S2.S139 (PMC5081295; doi:10.3346/jkms.2016.31.s2.s139), 2016-06-08
Supplement: jkms-31-S139-s001.pdf [file jkms-31-S139-s001.pdf]

**Supplementary Table 1.** Diseases assessed in this study

| No. | Diseases                                 | KNHANES III<br>(2005) | KNHANES<br>IV (2008) | KNHANES V<br>(2011) |
|-----|------------------------------------------|-----------------------|----------------------|---------------------|
| 1   | Stroke                                   | v                     | v                    | v                   |
| 2   | Myocardial infarction                    | v                     | v                    | v                   |
| 3   | Angina                                   | v                     | v                    | v                   |
| 4   | Osteoarthritis                           | v                     | v                    | v                   |
| 5   | Rheumatoid arthritis                     | v                     | v                    | v                   |
| 6   | Tuberculosis                             | v                     | v                    | v                   |
| 7   | Asthma                                   | v                     | v                    | v                   |
| 8   | Diabetes mellitus                        | v                     | v                    | v                   |
| 9   | Depression                               | v                     | v                    | v                   |
| 10  | Atopic dermatitis                        | v                     | v                    | v                   |
| 11  | Chronic kidney disease                   | v                     | v                    | v                   |
| 12  | Hepatitis B                              | v                     | v                    | v                   |
| 13  | Hepatitis C                              |                       | v                    | v                   |
| 14  | Liver cirrhosis                          | v                     | v                    | v                   |
| 15  | Congenital heart disease                 | v                     | v                    | v                   |
| 16  | Epilepsy                                 | v                     | v                    | v                   |
| 17  | Attention deficit hyperactivity disorder | v                     | v                    | v                   |
| 18  | Urinary tract infection                  | v                     | v                    | v                   |
| 19  | Pneumonia                                | v                     | v                    | v                   |
| 20  | Chronic obstructive pulmonary disease    | v                     | v                    | v                   |
| 21  | Gastric cancer                           | v                     | v                    | v                   |
| 22  | Liver cancer                             | v                     | v                    | v                   |
| 23  | Colon cancer                             | v                     | v                    | v                   |
| 24  | Breast cancer                            | v                     | v                    | v                   |
| 25  | Cervical cancer                          | v                     | v                    | v                   |
| 26  | Lung cancer                              | v                     | v                    | v                   |
| 27  | Thyroid cancer                           | v                     | v                    | v                   |
| 28  | Other cancer*                            | v                     | v                    | v                   |

KNHANES, Korea National Health and Nutrition Examination Survey.

\*List of other cancers: non-melanoma, ovarian cancer, brain cancer, biliary tract cancer, lymphoma, bladder cancer, nasopharynx cancer, melanoma, leukemia, mouth cancer, larynx cancer, kidney cancer, chondrosarcoma, uterine cancer, prostate cancer, rectal cancer, pancreatic cancer, and esophageal cancer.
